# Supplementary material
Source: publisher figshare collection journal article supplement (https://scielo.figshare.com/articles/dataset/_/5772099)
Supplement: Supplementary file 1 [file Table_1.xls]

## Sheet: Table_1
<b>Tópico tratado na fase</b>	<b>Historiando o conflito</b>	<b>Tópico iniciado por Sônia</b>	<b>Tópico iniciado por Rui</b>	<b>Tópico iniciado por Arminda</b>
A casa em que Rui e Arminda residiam e os direitos sobre o imóvel	Uma (1) sequência	X
A relação dos filhos de Rui e Arminda com a nova companheira de Sr. Rui	Uma (1) sequência			X
O cuidado dos pais com os filhos	Uma (1) sequência	X
O processo de pedido de guarda	Uma (1) sequência			X
A pensão alimentícia	Duas (2) sequências	X
O novo relacionamento de Arminda	Três (3) sequências	X	X
As visitas dos pais aos filhos	Duas (2) sequências	X	X
A distância entre as casas do pai e da mãe e as visitas aos filhos	Duas (2) sequências	X	X
O comportamento da filha diante das ameaças feitas contra seu pai	Uma (1) sequência		X
A relação de Arminda e sua mãe	Uma (1) sequência	X
O trabalho de Arminda	Uma (1) sequência	X
A presença de Maria Eduarda no forró	Uma (1) sequência		X
O incêndio da casa, os furtos e as acusações	Três (3) sequências		X	X
O motivo de o companheiro de d. Arminda ter batido em Vitor	Uma (1) sequência		X
O conflito e as brigas entre Rui e a família de Arminda	Duas (2) sequências	X		X
O comportamento agressivo de Arminda	Duas (2) sequências		X
O roubo do celular e a defesa contra a agressão sofrida por Arminda	Uma (1) sequência		X
O emprego de Rui	Uma (1) sequência	X
O comportamento violento de Rui	Quatro (4) sequências	X		X
As ocorrências realizadas contra Rui	Uma (1) sequência	X
A carta escrita pela filha do casal	Uma (1) sequência			X
A família de Rui	Uma (1) sequência			X
O envolvimento constante da polícia na vida familiar	Duas (2) sequências			X
